# Supplementary material for: Cross-seeding of WT amyloid-β with Arctic but not Italian familial mutants accelerates fibril formation in Alzheimer's disease
Source: PubMed Central journal article supplement (PMC9243174; doi:10.1016/j.jbc.2022.102071), 2022-05-25
Supplement: mmc1.pdf [file mmc1.pdf]

## **Supplemental:**

# **Cross-seeding of wild-type Amyloid- $\beta$ with Arctic but not Italian familial mutants accelerates fibril formation in Alzheimer's Disease**

Ruina Liang , Yao Tian and John H. Viles

## **Supplemental Figures S1 –S12**

**Supplemental Figure S1:** TEM images at equilibrium phase Arctic and Italian Isoforms.

**Supplemental Figure S2:** A $\beta$ 42(Italian) monomer cross-seeding with A $\beta$ (WideType) and A $\beta$ (Italian) fibrils.

**Supplemental Figure S3:** A $\beta$ 40(Arctic) monomer cross-seeding with A $\beta$ (WideType) and A $\beta$ (Arctic) fibrils.

**Supplemental Figure S4:** A $\beta$ 40(WildType) monomer cross-seeding with A $\beta$ (WildType), A $\beta$ (Italian) and A $\beta$ (Arctic) fibrils.

**Supplemental Figure S5:** A $\beta$ 42(WildType) monomer cross-seeding with A $\beta$ (Arctic), A $\beta$ 42(Italian) and A $\beta$ (WildType) fibrils.

**Supplemental Figure S6:** Tabulation of mean half-times for cross-seeding conditions.

**Supplemental Figure S7:** Cross-seeding of WildType A $\beta$ 40 fibrillization with seeds at different concentrations.

**Supplemental Figure S8:** C-Amidated A $\beta$ 42

**Supplemental Figure S9:** TEM images of both seeded and unseeded A $\beta$ 42(WildType) and A $\beta$ 40(Arctic).

**Supplemental Figure S10:** TEM images of both seeded and unseeded A $\beta$ 40(Arctic).

**Supplemental Figure S11:** TEM images of both seeded and unseeded A $\beta$ 40(Arctic).

**Supplemental Figure S12:** TEM images of both seeded and unseeded A $\beta$ 40(WildType).

### a) A $\beta$ 40(Arctic)

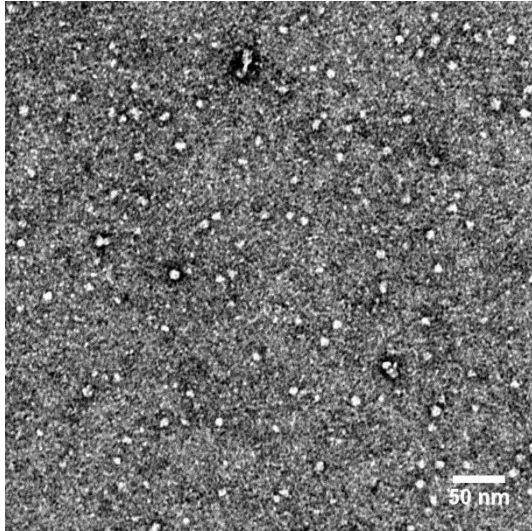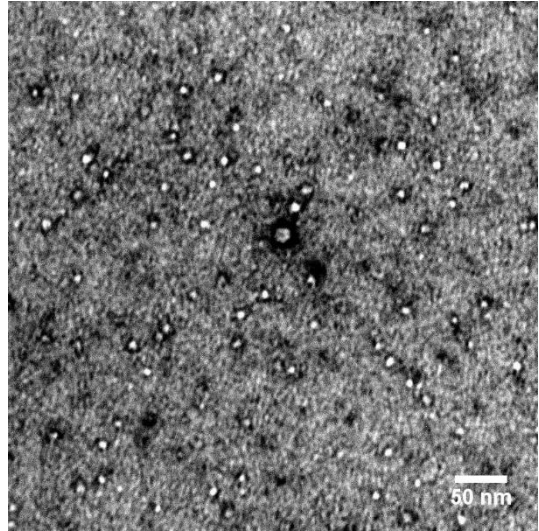

### b) A $\beta$ 42(Arctic)

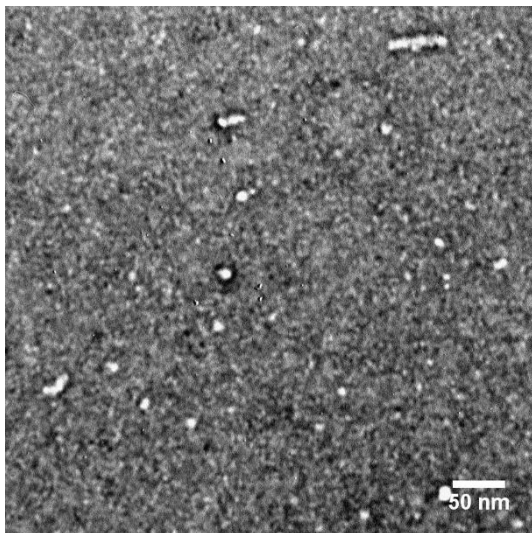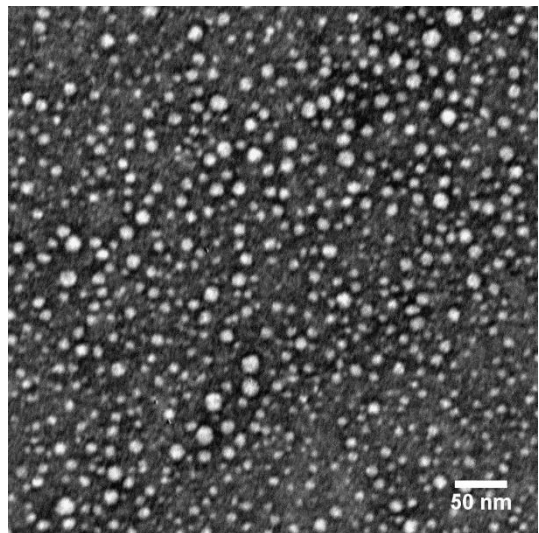

**Supplemental Figure S1: TEM images at equilibrium phase Arctic and Italian Isoforms.** Many oligomers as well as fibrils are observed at equilibrium for four mutant A $\beta$  isoforms: a) A $\beta$ 40(Arctic); b) A $\beta$ 42(Arctic); c) A $\beta$ 40(Italian); d) A $\beta$ 42(Italian). Negatively stained TEM images generated from 10  $\mu$ M A $\beta$  isoforms. Once ThT has reached maximum after 50 hrs incubation at pH 7.4, HEPES buffer (30 mM) and NaCl (160 mM).

### c) A $\beta$ 40(Italian)

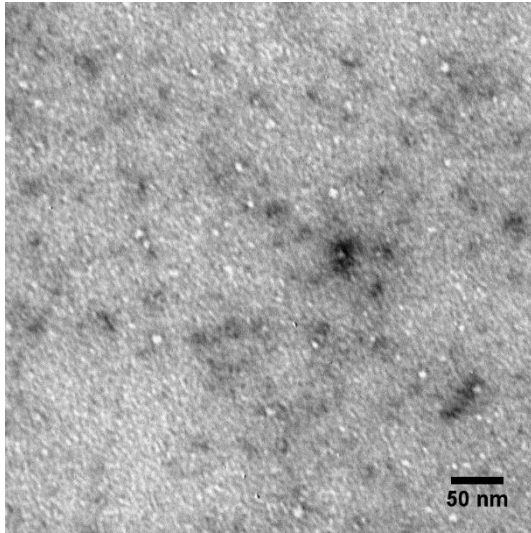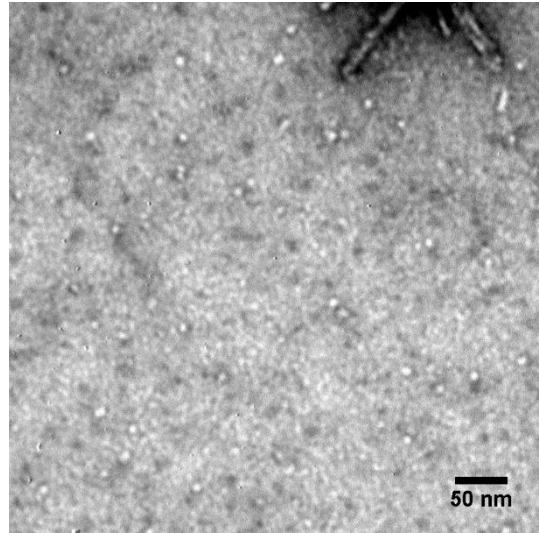

### d) A $\beta$ 42(Italian)

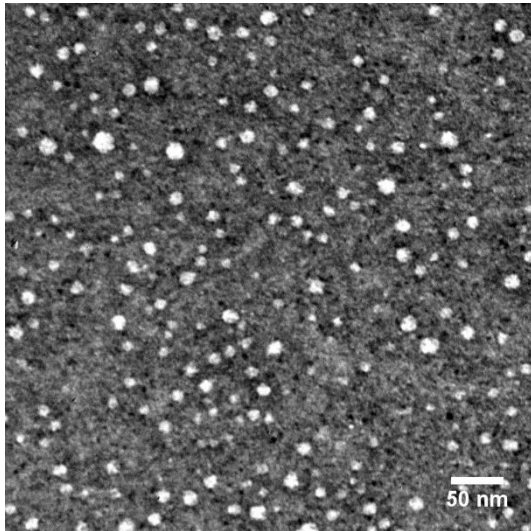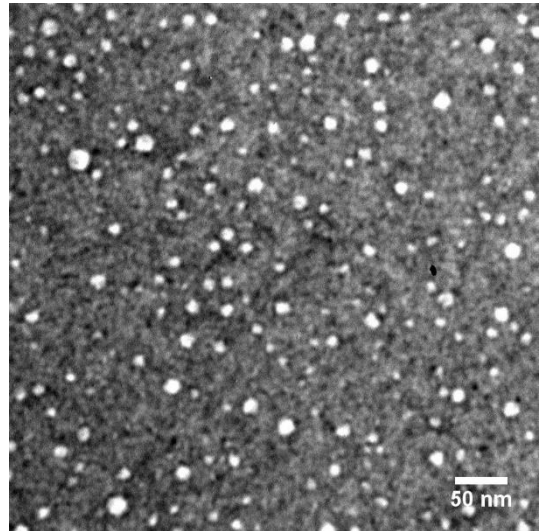

**Supplemental Figure S1: TEM images at equilibrium phase Arctic and Italian Isoforms.** Many oligomers as well as fibrils are observed at equilibrium for four mutant A $\beta$  isoforms: a) A $\beta$ 40(Arctic); b) A $\beta$ 42(Arctic); c) A $\beta$ 40(Italian); d) A $\beta$ 42(Italian). Negatively stained TEM images generated from 10  $\mu$ M A $\beta$  isoforms. Once ThT has reached maximum after 50 hrs incubation at pH 7.4, HEPES buffer (30 mM) and NaCl (160 mM).

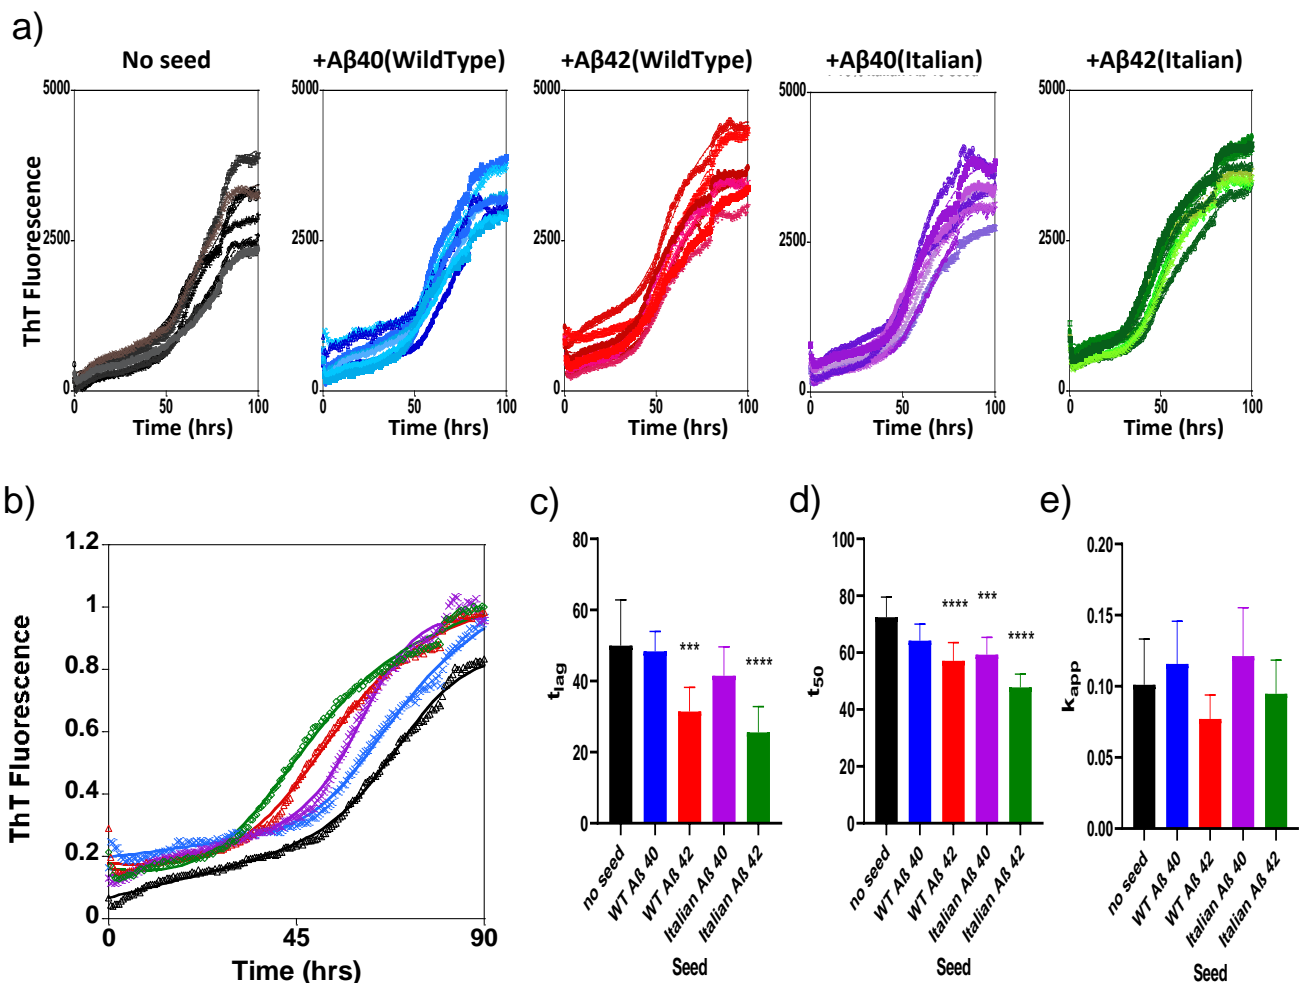

**Supplemental Figure S2: A $\beta$ 42(Italian) monomer cross-seeding with A $\beta$ (WideType) and A $\beta$ (Italian) fibrils.** a) Fibril formation of monomeric A $\beta$ 42(Italian) in presence of a range A $\beta$  isoform fibril seeds (10 % w/w): No seed (black); A $\beta$ 40(WildType) (blue); A $\beta$ 42(WildType) (red); A $\beta$ 40(Italian) (purple) and; A $\beta$ 42(Italian) (green). b) Typical representative (median) single trace of A $\beta$ 42(Italian) in the absence and presence of different seeds, same colours. Empirical kinetic parameters for:  $t_{lag}$  (c);  $t_{50}$  (d) and  $k_{app}$  (e) of A $\beta$ 42(Italian) fibril formation, mean from n=9 for each condition, error bars are standard deviation. Total A $\beta$  is 10  $\mu$ M at pH 7.4. Self-seeding with A $\beta$ 42(Italian) fibrils (in green) most effectively nucleates fibril formation, with a large reduction in the lag-time. One-way ANOVA test, a comparison between unseeded and seeded kinetics \*\*\*\*P  $\leq$  0.0001, \*\*\*P  $\leq$  0.001.

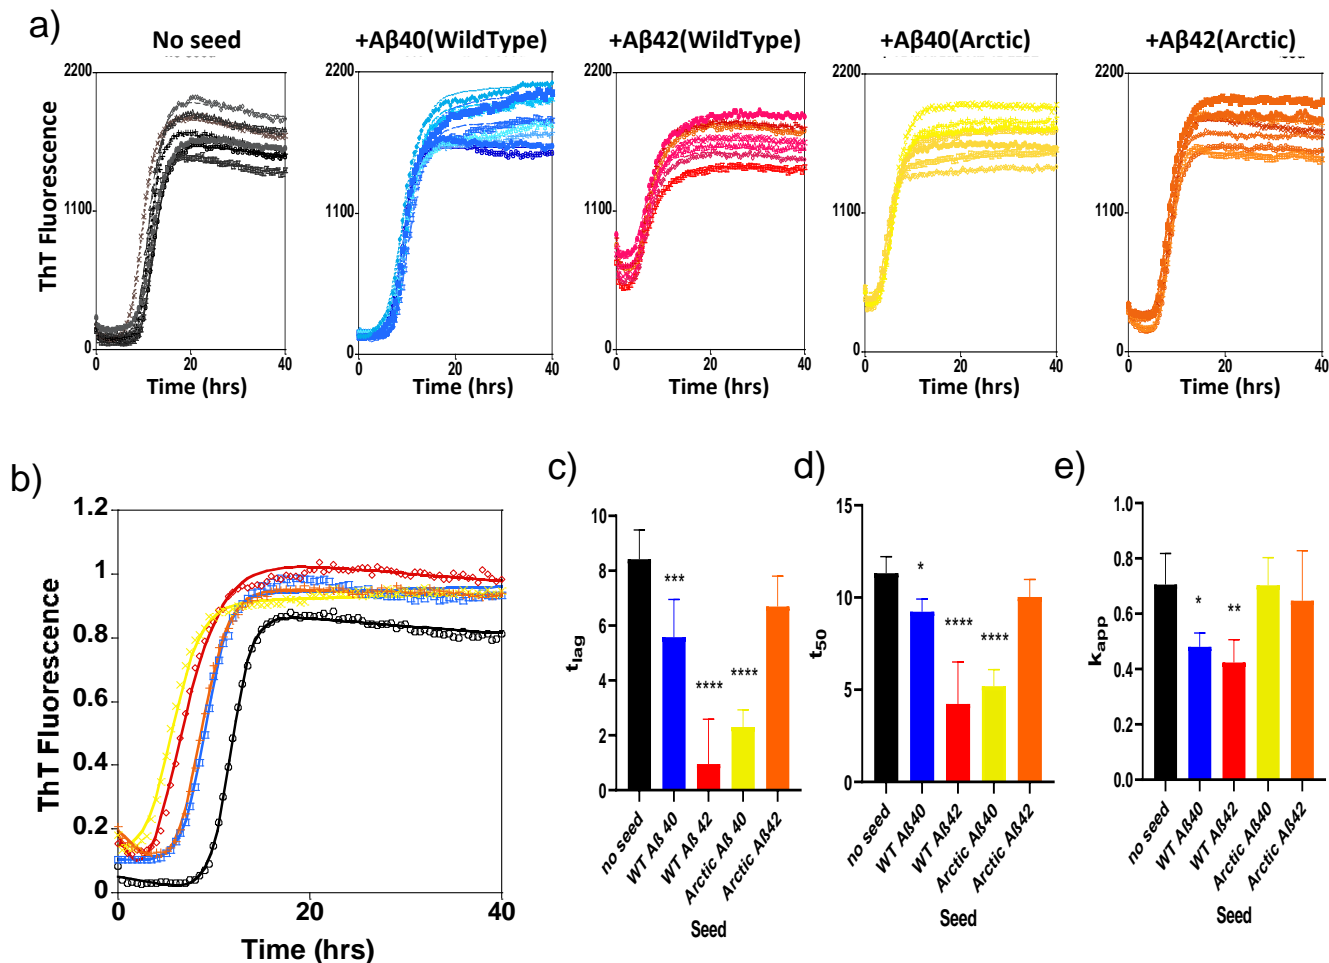

**Supplemental Figure S3: A $\beta$ 40(Arctic) monomer cross-seeding with A $\beta$ (WideType) and A $\beta$ (Arctic) fibrils.** a) Fibril formation of monomeric A $\beta$ 40(Arctic) in presence of a range A $\beta$  isoform fibril seeds (10 % w/w): No seed (black); A $\beta$ 40(WildType) (blue); A $\beta$ 42(WildType) (red); A $\beta$ 40(Arctic) (yellow) and; A $\beta$ 42(Italian) (orange). b) Typical representative (median) single trace of A $\beta$ 40(Arctic) in the absence and presence of different seeds, same colours. Empirical kinetic parameters:  $t_{lag}$  (c),  $t_{50}$  (d) and  $k_{app}$  (e) of A $\beta$ 40(Arctic) fibril formation, mean from n=9 for each condition, error bars are standard deviation. Total A $\beta$  is 10  $\mu$ M at pH 7.4. Self-seeding with A $\beta$ 40(Arctic) fibrils (in yellow) effectively nucleates fibril formation, surprisingly A $\beta$ 42(WildType) (in red) is also very effective at nucleating fibril formation, with a large reduction in the lag-time. One-way ANOVA test, a comparison between unseeded and seeded kinetics, \*P  $\leq$  0.05, \*\*P  $\leq$  0.01, \*\*\*P  $\leq$  0.001, \*\*\*\*P  $\leq$  0.0001.

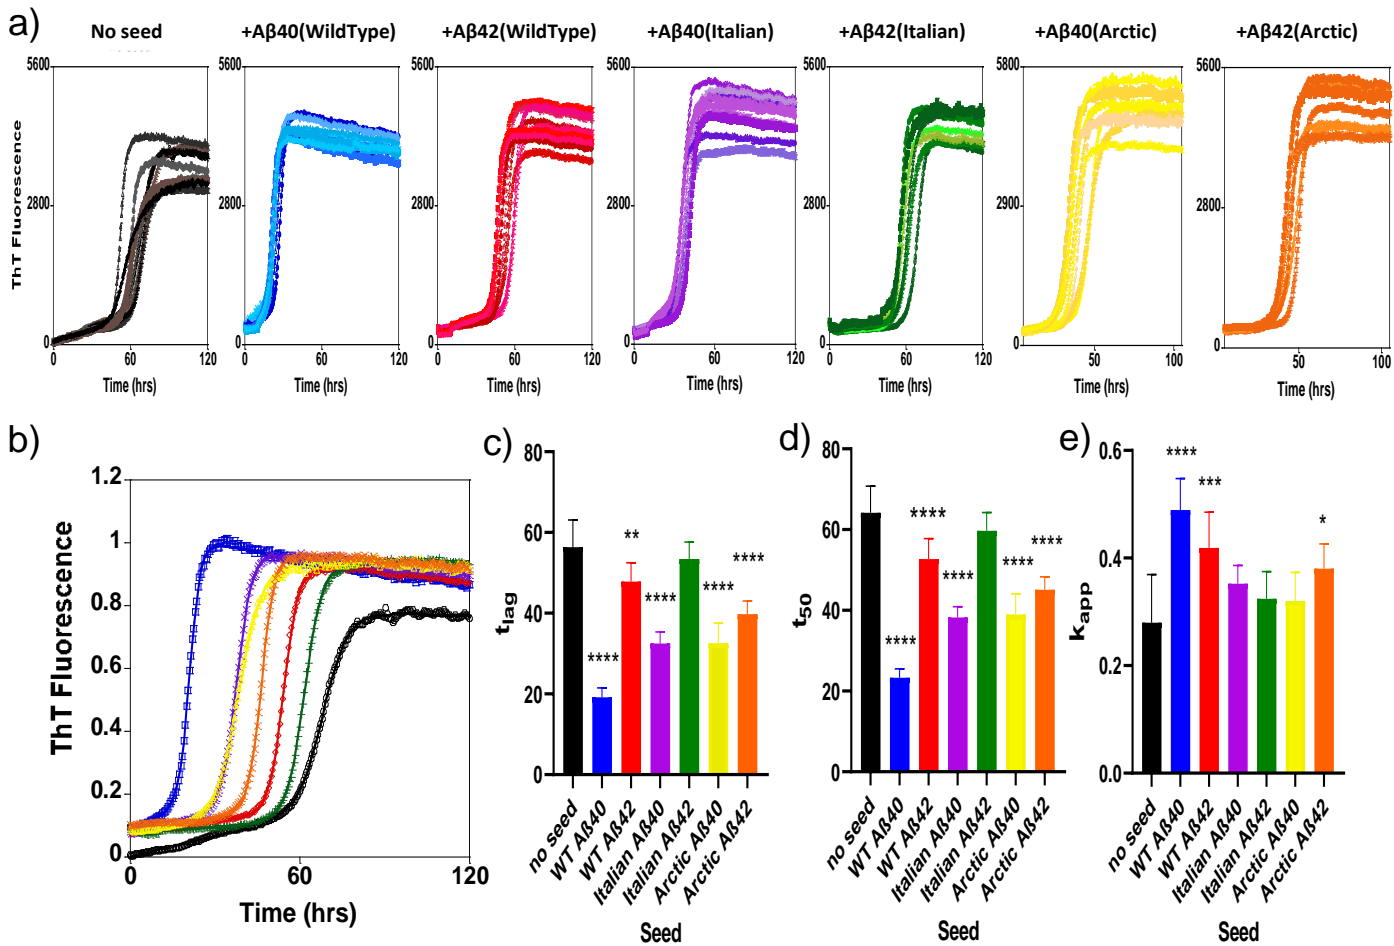

**Supplemental Figure S4: A $\beta$ 40(WildType) monomer cross-seeding with A $\beta$ (WildType), A $\beta$ (Italian) and A $\beta$ (Arctic) fibrils.** a) Fibril formation of monomeric A $\beta$ 40(WildType) in presence of a range A $\beta$  isoform fibril seeds (10 % w/w): no seed (black); A $\beta$ 40(WildType) (blue); A $\beta$ 42(WildType) (red); A $\beta$ 40(Italian) (purple); A $\beta$ 42(Italian) (green); A $\beta$ 40(Arctic) (yellow) and; A $\beta$ 42(Arctic) (orange); b) Typical representative (median) single trace of A $\beta$ 40(WildType) in the absence and presence of different seeds. Empirical kinetic parameters:  $t_{lag}$  (c),  $t_{50}$  (d) and  $k_{app}$  (e) of A $\beta$ 40(WildType) fibril nucleation, mean from n=9 for each condition, error bars are standard deviation. Total A $\beta$  is 10  $\mu$ M at pH 7.4. Self-seeding with A $\beta$ 40(WildType) fibrils (in blue) effectively nucleates fibril formation, with a large reduction in the lag-time. One-way ANOVA test, a comparison between unseeded and seeded kinetics: \*P  $\leq$  0.05, \*\*P  $\leq$  0.01, \*\*\*P  $\leq$  0.001, \*\*\*\*P  $\leq$  0.0001.

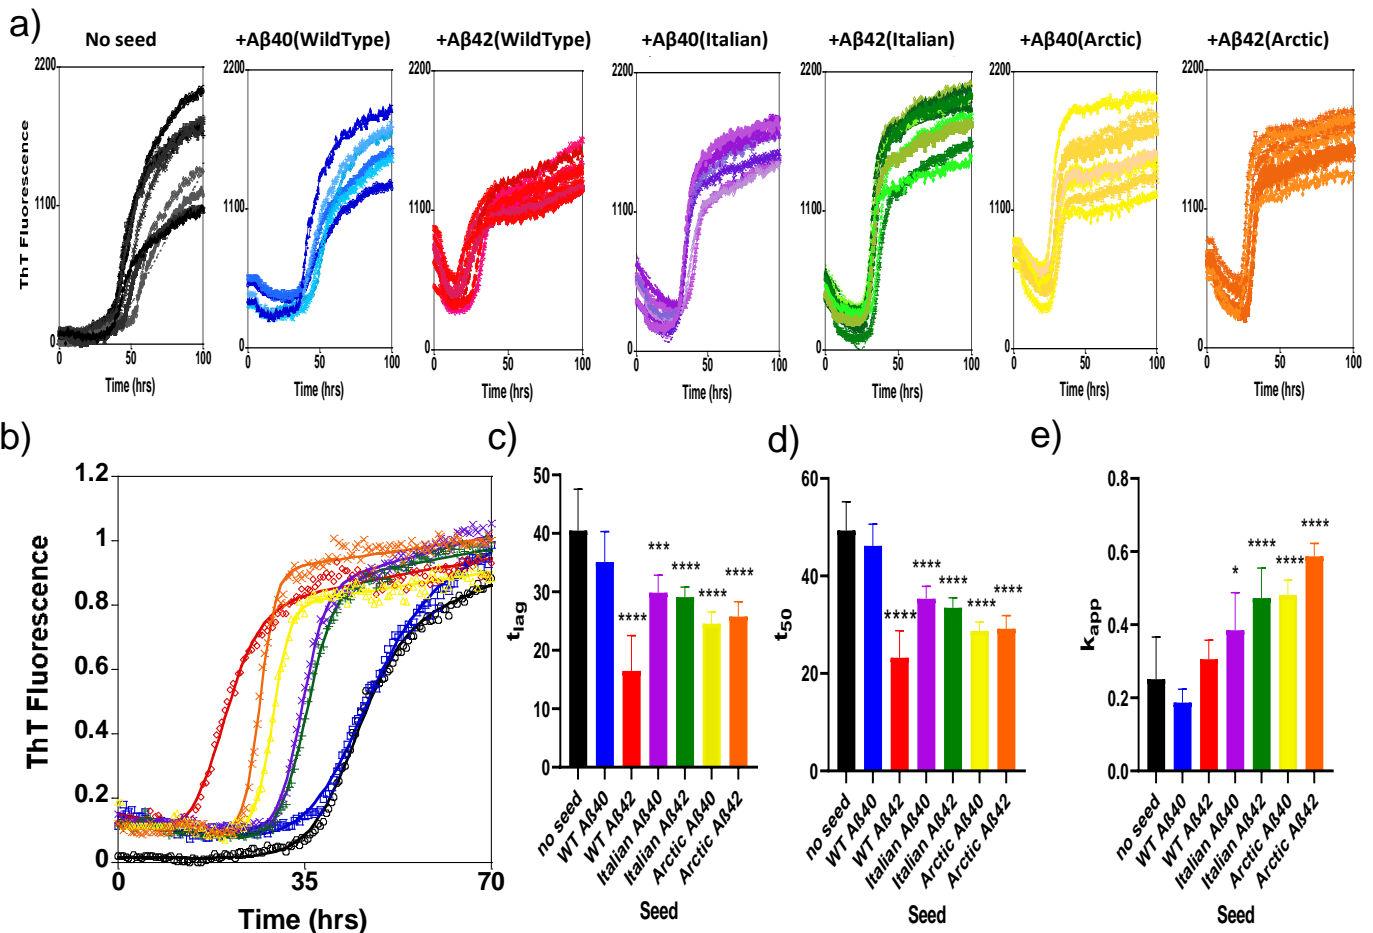

**Supplemental Figure S5: A $\beta$ 42(WildType) monomer cross-seeding with A $\beta$ (Arctic), A $\beta$ 42(Italian) and A $\beta$ (WildType) fibrils.** a) Fibril formation of monomeric A $\beta$ 42(WildType) in presence of a range A $\beta$  isoform fibril seeds (10 % w/w): No seed (black); A $\beta$ 40(WildType) (blue); A $\beta$ 42(WildType) (red); A $\beta$ 40(Italian) (purple); A $\beta$ 42(Italian) (green); A $\beta$ 40(Arctic) (yellow) and; A $\beta$ 42(Italian) (orange). b) Typical representative (median) single trace of A $\beta$ 42(WildType) in the absence and presence of different seeds, same colours. Empirical kinetic parameters:  $t_{lag}$  (c),  $t_{50}$  (d) and  $k_{app}$  (e) of A $\beta$ 42(WildType) fibril formation, mean from n=9 for each condition, error bars are standard deviation. Total A $\beta$  is 10  $\mu$ M at pH 7.4. Self-seeding with A $\beta$ 42(WildType) fibrils (in red) effectively nucleates fibril formation as do both Arctic mutants, with a large reduction in the lag-time. One-way ANOVA test, a comparison between unseeded and seeded kinetics \*P  $\leq$  0.05, \*\*\*P  $\leq$  0.001, \*\*\*\*P  $\leq$  0.0001.

| $t_{50}$ (%) | No seed | + seeds of: |      |      |      |       |       |
|--------------|---------|-------------|------|------|------|-------|-------|
|              |         | Wt40        | Wt42 | It40 | It42 | Arc40 | Arc42 |
| <b>Wt40</b>  | 100%    | 36%         | 82%  | 60%  | 93%  | 61%   | 70%   |
| <b>Wt42</b>  | 100%    | 93%         | 47%  | 72%  | 68%  | 58%   | 59%   |
| <b>It40</b>  | 100%    | 61%         | 79%  | 34%  | 72%  | —     | —     |
| <b>It42</b>  | 100%    | 87%         | 79%  | 82%  | 66%  | —     | —     |
| <b>Arc40</b> | 100%    | 82%         | 37%  | —    | —    | 46%   | 87%   |

**Supplemental Figure S6: Tabulation of mean half-times for cross-seeding conditions.** a) summary of half-time values for cross-seeding conditions in hours b) summary of half-times for cross-seeding conditions relative to non-seeded monomer.  $t_{50}$  presented as a percentage, relative to non-seeded monomer (100%). Red highlighting strong seeding, orange indicates some seeding, and green, minimal seeding. Wild-Type (Wt), Italian (It) and Arctic (Arc).



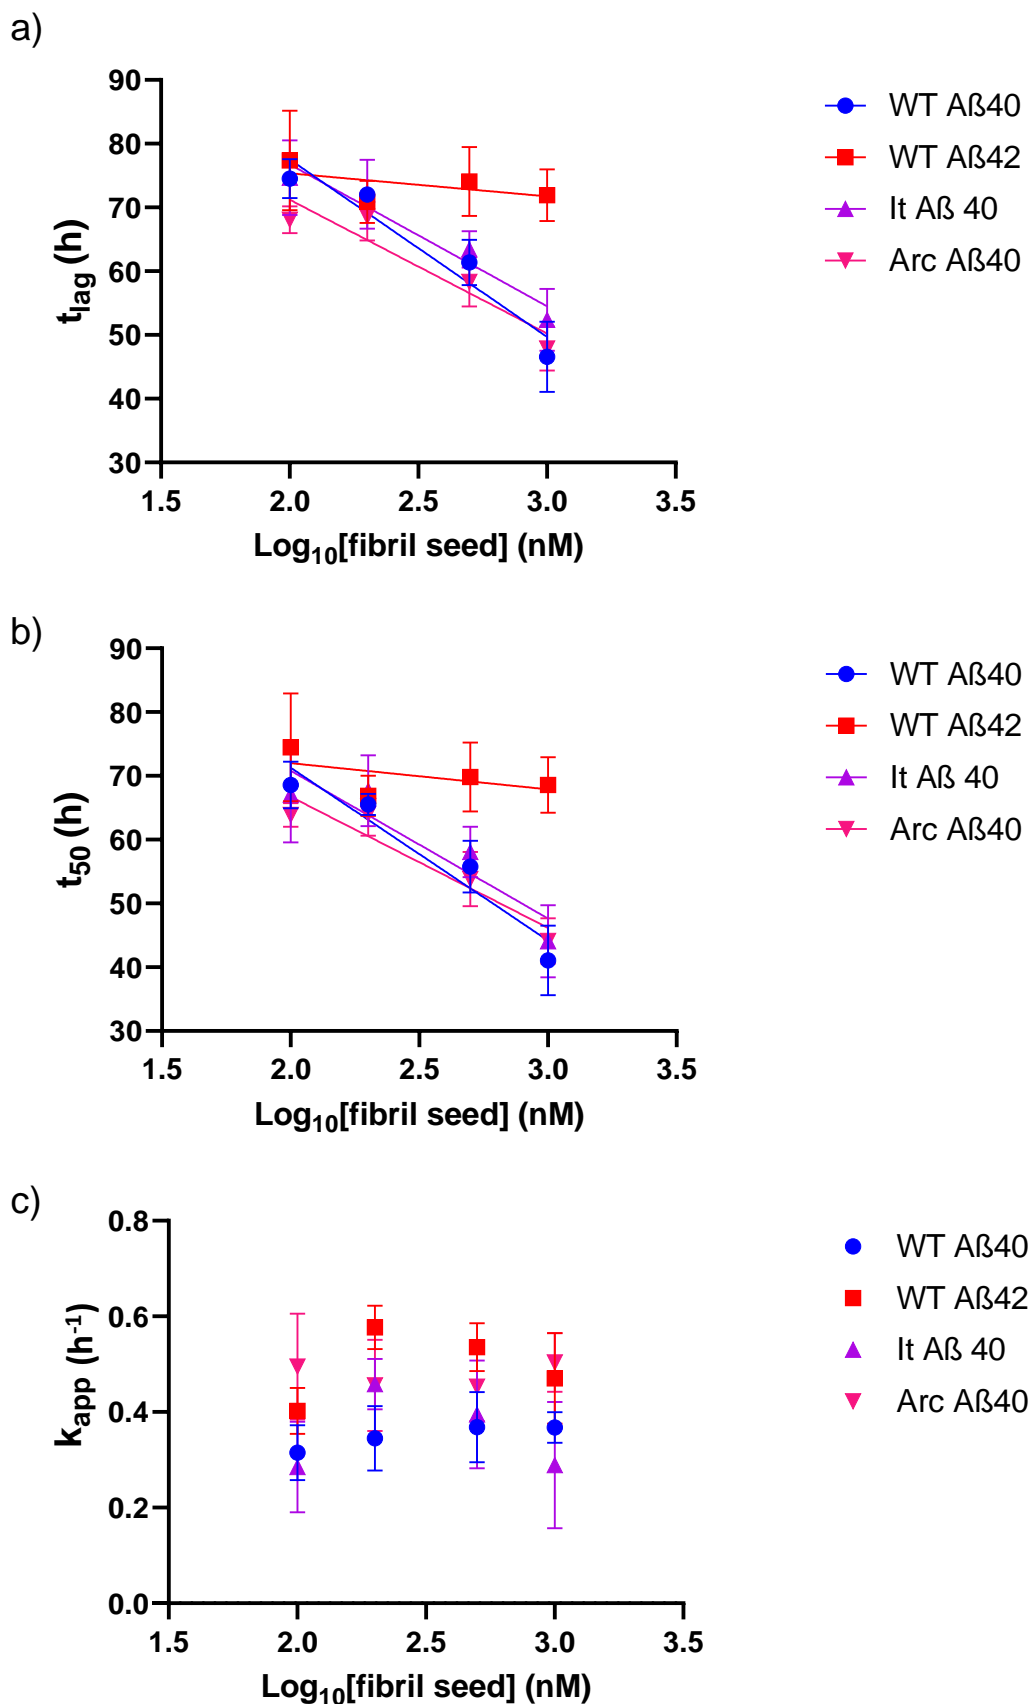

**Supplemental Figure S7: Cross-seeding of WildType A $\beta$ 40 fibrillization with seeds at different concentrations.** a,b,c) Lag time  $t_{lag}$ (a), half  $t_{50}$  (b) and  $k_{app}$  of WildType A $\beta$ 40 aggregation in the presence of fibril seeds: blue, WildType A $\beta$ 40; red, WildType A $\beta$ 42; purple, Italian A $\beta$ 40; and magenta, Arctic A $\beta$ 40. Symbols and error bars are the average and standard deviation of the four cross-seeding experiments.

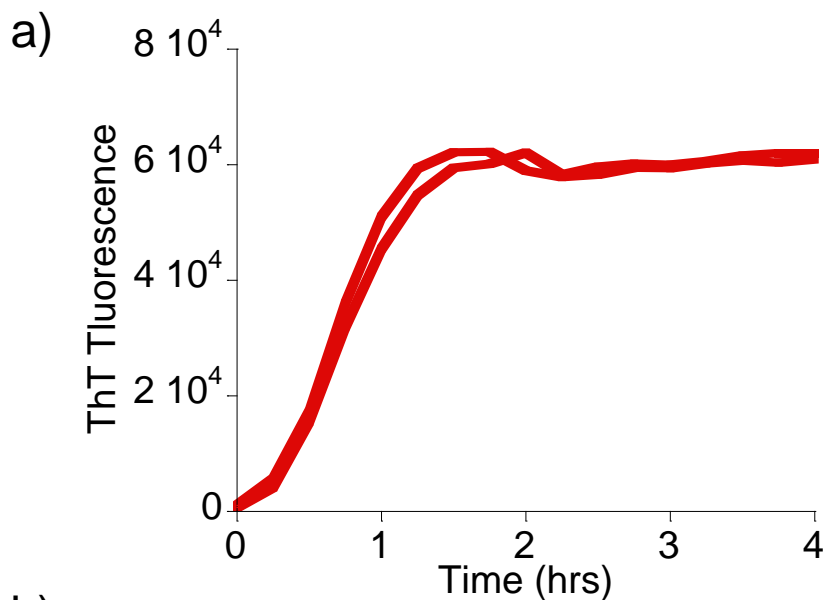

b)

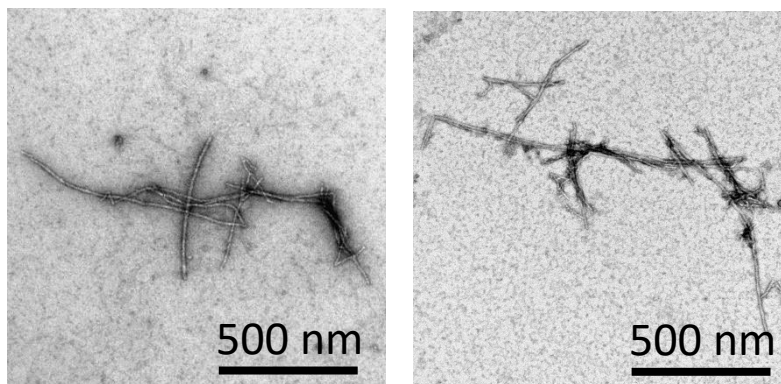

**Supplemental Figure S8: C-Amidated A $\beta$ 42** (a) Fibril growth kinetics of C-Amidated A $\beta$ 42. C-amidated A $\beta$ 42 (10  $\mu$ M) was incubated with ThT (20  $\mu$ M) in aqueous buffer containing NaCl (160 mM), HEPES (30 mM), at pH 7.4. (b) TEM images of C-amidated A $\beta$ 42 fibril. Negatively stained TEM images generated from 10  $\mu$ M C-amidated A $\beta$ 42, 72 hrs incubation at pH 7.4, HEPES buffer (30 mM) and NaCl (160 mM).

**a) Arc40**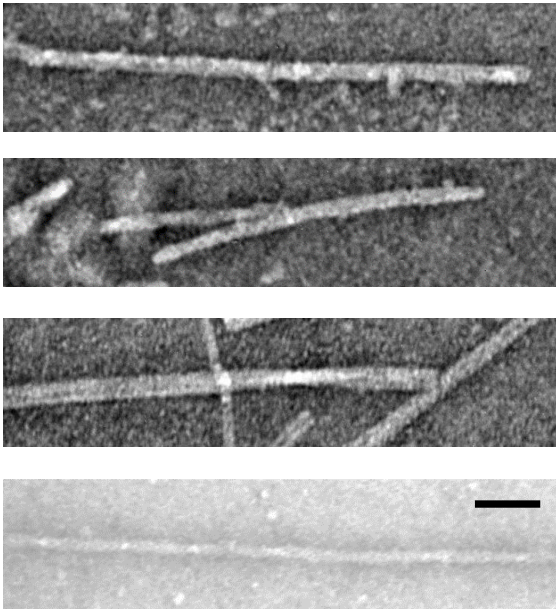**b) WT42**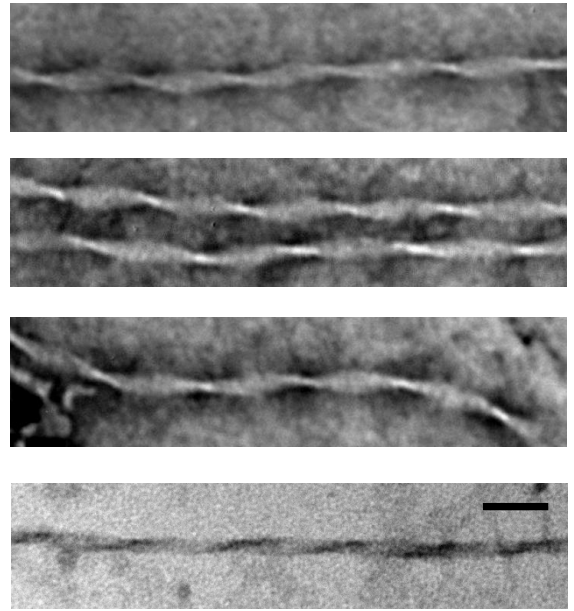**c) Arc40 +WT42 seed**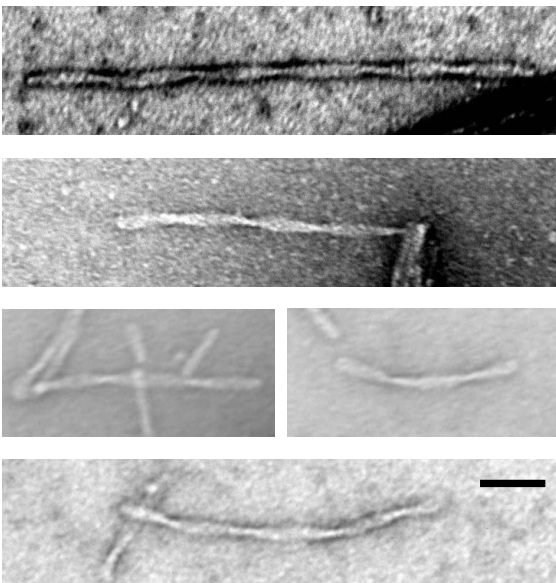**d) WT42 + Arc40 seed**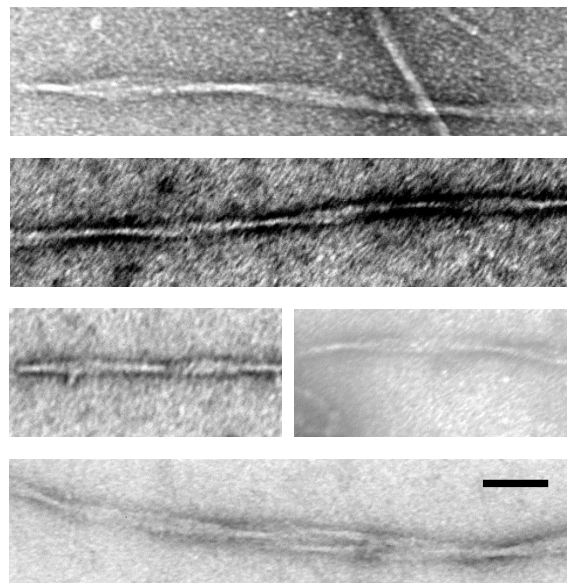

**Supplemental Figure S9:** TEM images of both seeded and unseeded A $\beta$ 42(WildType) and A $\beta$ 40(Arctic). a) A $\beta$ 40(Arctic); b) A $\beta$ 42(WildType); c) A $\beta$ 40(Arctic) with 10% A $\beta$ 42(WildType) fibril-seeds; d) A $\beta$ 42(WildType) with 10% A $\beta$ 40(Arctic) fibril-seeds. A $\beta$ 40(Arctic) with A $\beta$ 42(WildType) fibril-seeds added indicates cross-seeding as the A $\beta$ 42(WildType) fibril seed induces a marked twist in the otherwise untwisted A $\beta$ 40(Arctic) fibril isoform. While A $\beta$ 40(Arctic) fibril seeds cause a marked extension in the periodicity of the A $\beta$ 42(WildType) fibril twist from 80 nm to 125 nm. Scale Bar: 50 nm. (Note that Fig 7 is a simplified version of the data shown here, images are reshown here to aid direct comparison)

**a) Arc40**

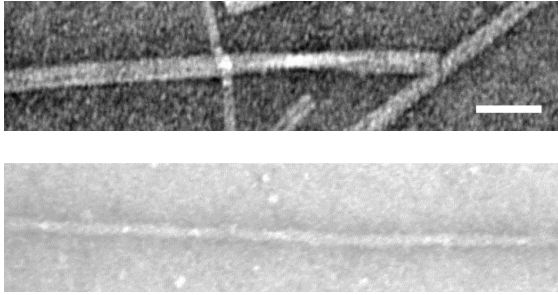

**b) Arc42**

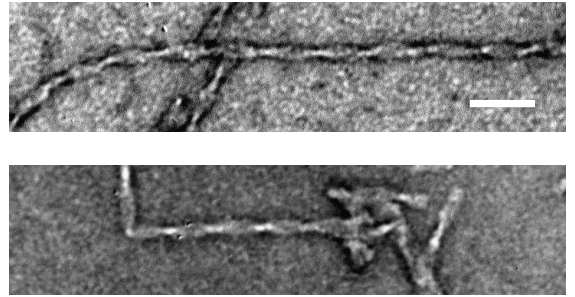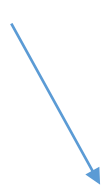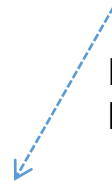

**No evidence of seeding  
by A $\beta$ 42(Arctic)**

**c) Arc40 + 10% Arc42 seed**

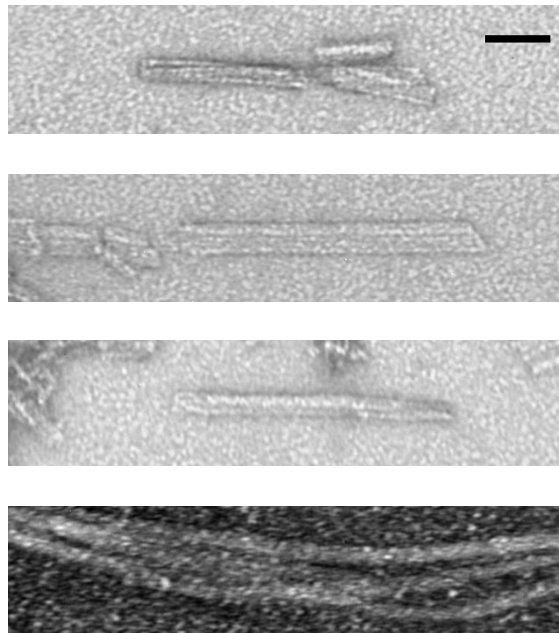

**Supplemental Figure S10:** TEM images of both seeded and unseeded A $\beta$ 40(Arctic). a) A $\beta$ 40(Arctic); b) A $\beta$ 42(Arctic); c) A $\beta$ 40(Arctic) with 10% A $\beta$ 42(Arctic) fibril-seeds. The morphology of A $\beta$ 40(Arctic) is unchanged by the presence of the highly twisted A $\beta$ 42(Arctic) fibril-seeds added, suggesting no cross-seeding. Scale Bar: 50 nm. (Note that the two images of unseeded A $\beta$ 40(Arctic) are reshown here to aid direct comparison with seeded fibrils and have already been shown in Fig S9a)

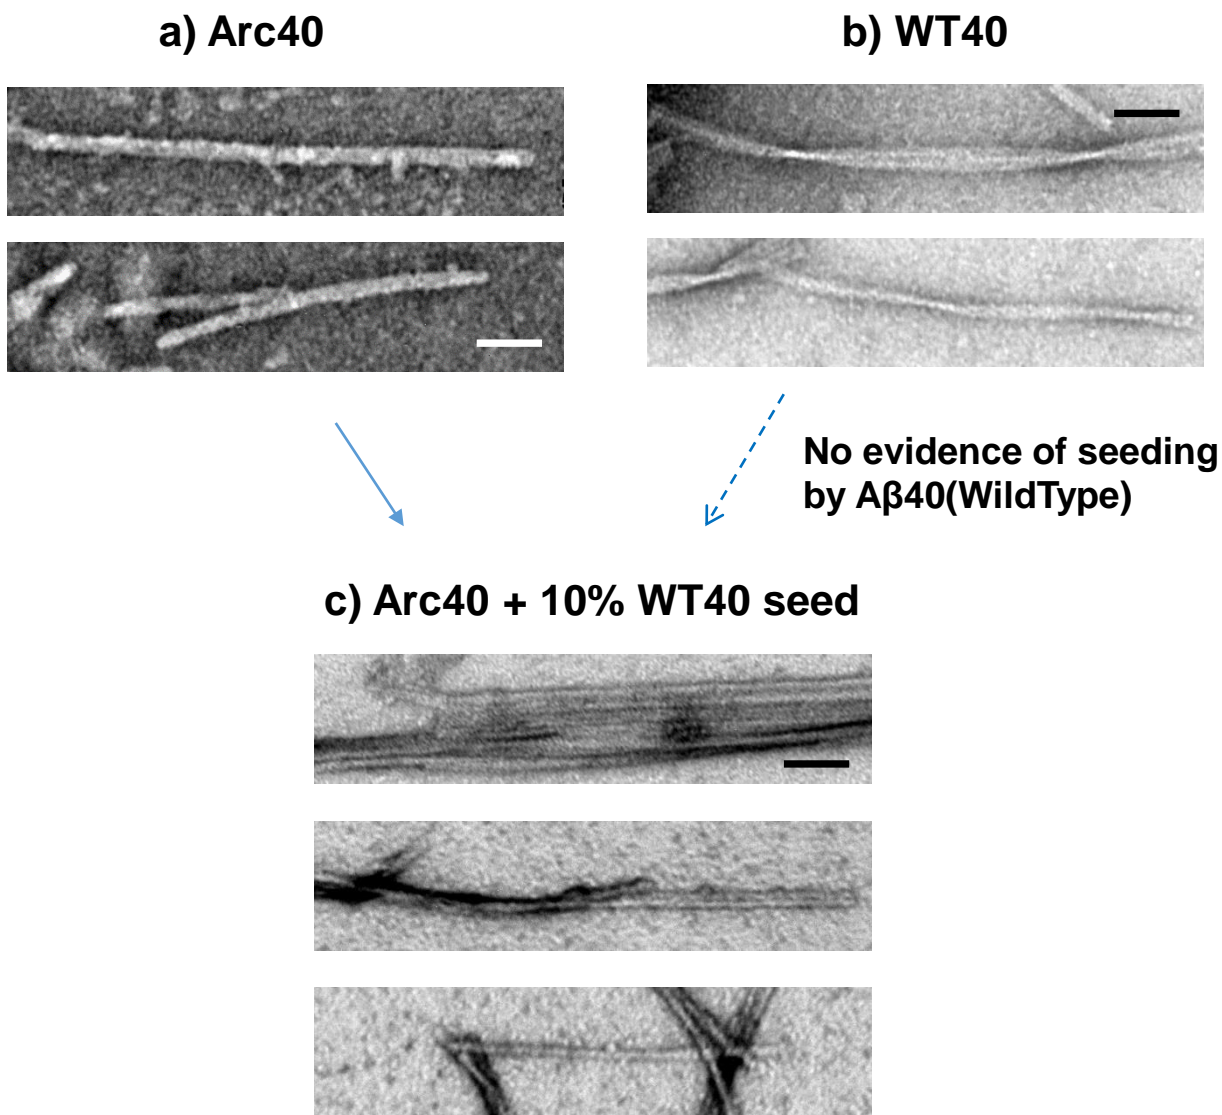

**Supplemental Figure S11:** TEM images of both seeded and unseeded A $\beta$ 40(Arctic), a) A $\beta$ 40(Arctic); b) A $\beta$ 40(WildType); c) A $\beta$ 40(Arctic) with 10% A $\beta$ 40(WildType) fibril-seeds. The morphology of A $\beta$ 40(Arctic) is unchanged by the more twisted presence of A $\beta$ 40(WildType) fibril-seeds added, suggesting no cross-seeding. Scale Bar: 50 nm. (Note that the two images of unseeded A $\beta$ 40(Arctic) are reshown here to aid direct comparison with seeded fibrils and have already been shown in Fig S9a)

**a) WT40**

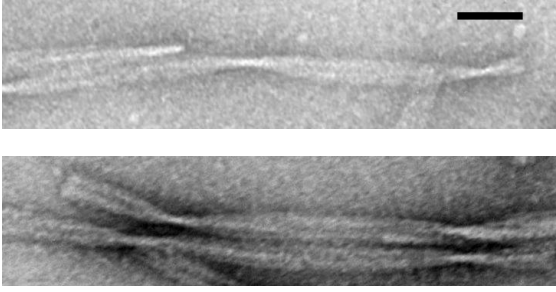

**b) Arc42**

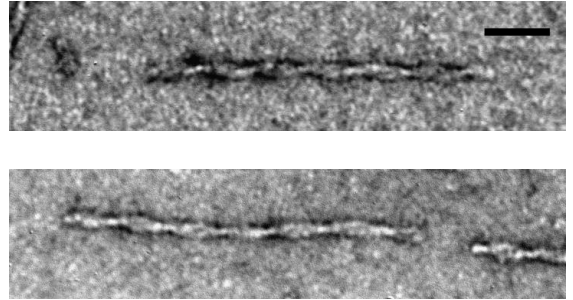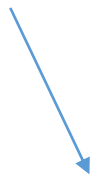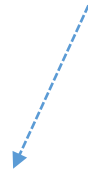

**No evidence of seeding  
by A $\beta$ 42(Arctic)**

**c) Wt40 +10% Arc42 seed**

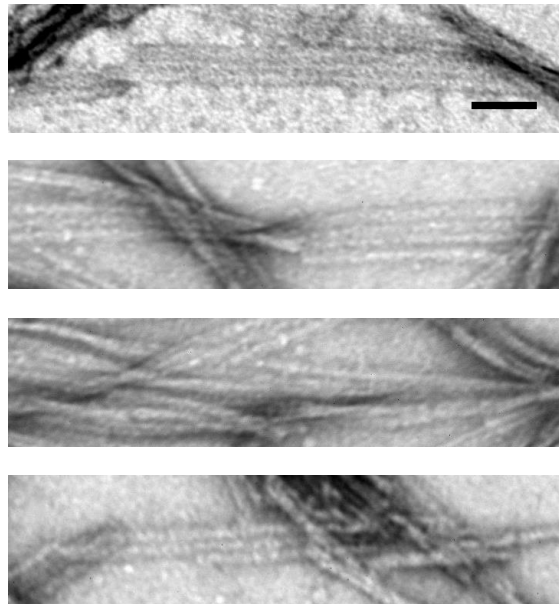

**Supplemental Figure S12:** TEM images of both seeded and unseeded A $\beta$ 40(WildType) a) A $\beta$ 40(WildType); b) A $\beta$ 42(Arctic); c) A $\beta$ 40(WildType) with 10% A $\beta$ 42(Arctic) fibril-seeds. The morphology of A $\beta$ 40(WildType) is unchanged by the presence of the highly twisted A $\beta$ 42(Arctic) fibril-seeds added, suggesting no cross-seeding. Scale Bar: 50 nm.
